# Supplementary material for: Safety and Efficacy of Anti-Inflammatory Therapy in Patients With Coronary Artery Disease: A Systematic Review and Meta-Analysis
Source: Research Square preprint supplement (doi:10.21203/rs.3.rs-961804/v1), 2021-10-25
Supplement: Supplementary file 1 [file 086b5415d92578728c615fa4.docx]

Supplementary Table 1. Search strategy of this meta-analysis.

| **Searches** | | **Results** |
| --- | --- | --- |
| **Pubmed search strategy** | |  |
| #1 | Search: ((((Methotrexate) OR (Canakinumab)) OR (Varespladib)) OR (Darapladib)) OR (Colchicine) | 3838 |
| #2 | Search: ((Inflammation) OR (interleukin)) OR (phospholipase A2) | 17760 |
| #3 | Search: ((((Atherosclerosis) OR (coronary artery disease)) OR (Acute coronary syndrome)) OR (Myocardial infarction)) OR (cardiovascular) | 56962 |
| #4 | Search: ((((((Methotrexate) OR (Canakinumab)) OR (Varespladib)) OR (Darapladib)) OR (Colchicine) AND (randomizedcontrolledtrial[Filter])) AND (((Inflammation) OR (interleukin-1)) OR (PLA2) AND (randomizedcontrolledtrial[Filter]))) AND (((((Atherosclerosis) OR (coronary artery disease)) OR (Acute coronary syndrome)) OR (Myocardial infarction)) OR (cardiovascular) AND (randomized controlled trial[Filter])) | 63 |
| **EMBASE search strategy.** | |  |
| #1 | 'methotrexate':ti,ab,kw OR 'canakinumab':ti,ab,kw OR 'varespladib':ti,ab,kw OR 'darapladib':ti,ab,kw OR 'colchicine':ti,ab,kw | 226620 |
| #2 | 'inflammation':ti,ab,kw OR 'interleukin':ti,ab,kw OR 'phospholipase A2':ti,ab,kw | 1023506 |
| #3 | 'atheroscierosis':ti,ab,kw OR 'cornory artery disease':ti,ab,kw OR 'acute cornory syndrome':ti,ab,kw OR 'myocardial infarction':ti,ab,kw OR 'cardiovascular' | 2107240 |
| #4 | #1 AND #2 AND #3 | 2817 |
| #5 | 'RCT':ti,ab,kw OR 'randomized controlled trial':ti,ab,kw | 919945 |
| #6 | #4 AND #5 | 381 |
| **Cochrane Library search strategy.** | |  |
| #1 | (Randomized Controlled Trial):ti,ab,kw OR (RCT):ti,ab,kw | 1193619 |
| #2 | (Methotrexate):ti,ab,kw OR (Canakinumab):ti,ab,kw OR (Varespladib):ti,ab,kw OR (Darapladib):ti,ab,kw OR (Colchicine):ti,ab,kw | 128861 |
| #3 | (Atheroscierosis):ti,ab,kw OR (Cornory Artery Disease):ti,ab,kw OR (Acute Cornory Syndrome):ti,ab,kw OR (Myocardial Infarction):ti,ab,kw OR (Cardiovascular) | 129011 |
| #4 | (Inflammation):ti,ab,kw OR (interleukin):ti,ab,kw OR (phospholipase A2):ti,ab,kw | 44439 |
| #5 | #1 and #2 and #3 and #4 | 234 |
| **Web of science search strategy** | |  |
| #1 | TS= (Methotrexate OR Canakinumab OR Varespladib OR Darapladib OR Colchicine) | 12863 |
| #2 | TS= (Atheroscierosis OR Cornory artery disease OR Acute cornory syndrome OR Myocardial infarction OR cardiovascular) | 199494 |
| #3 | TS= (Inflammation OR interleukin OR phospholipase A2) | 197047 |
| #4 | #1 AND #2 AND #3 | 337 |
| **Article searched by the ACC 2014 and ESC 2020** | |  |
|  | Study title: The STABILITY Investigators. Darapladib for Preventing Ischemic Events in Stable Coronary Heart Disease  Study title: Effect of Darapladib on Major Coronary Events After an Acute Coronary Syndrome The SOLID-TIMI 52 Randomized Clinical Trial.  Study title: S.M. Nidorf, A.T.L. Fiolet, A. Mosterd, et al. Colchicine in Patients with Chronic Coronary Disease. | 3 |

Supplementary Table 2. Summary of GRADE evidence quality for each outcome.


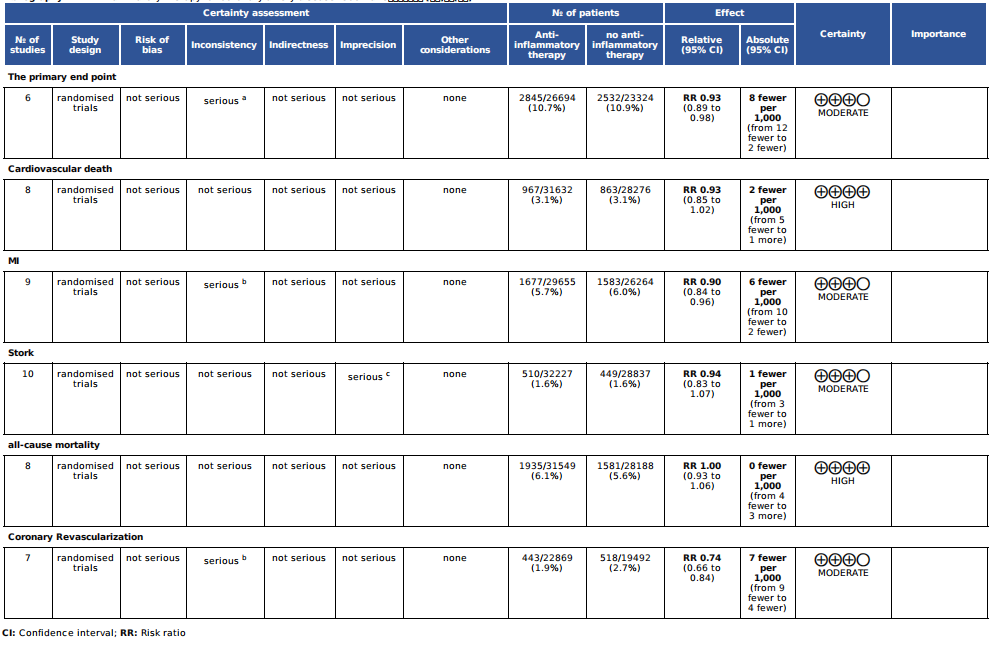


Supplementary Figure 1. Size of information required for each outcome. (A) The primary outcome, (B) MI, (C) Coronary revascularization, (D) Cardiovascular death, (E) Stroke.

Supplementary Figure 2. Assessment for the risk of bias in each randomized controlled trial included.

Supplementary Figure 3. Funnel plot of each outcome. (A) The primary outcome, (B) MI, (C) Coronary revascularization, (D) Cardiovascular death, (E) All-cause death, (F) Stroke.

Supplementary Figure 4. Funnel plot of each outcome. (A) The primary outcome, (B) MI, (C) Coronary revascularization, (D) Cardiovascular death, (E) All-cause death, (F) Stroke.
